# Supplementary material for: Pseudomonas aeruginosa PA14 produces R-bodies, extendable protein polymers with roles in host colonization and virulence
Source: PubMed Central journal article supplement (PMC8322103; doi:10.1038/s41467-021-24796-0), 2021-07-29
Supplement: 41467_2021_24796_MOESM3_ESM.pdf [file 41467_2021_24796_MOESM3_ESM.pdf]

## Description of Additional Supplementary Files

File Name: Supplementary Data 1

Description: *Pseudomonas aeruginosa* strains that contain homologues of *rebP1* (PA14\_27640), *fecl2* (PA14\_27690) and the *reb* gene cluster PA14\_27630-PA14\_27700. Strains were identified with a nucleotide NCBI BLAST against 312 complete genomes in *Pseudomonas aeruginosa* (taxid: 287). 189 strains contained the *reb* cluster with *rebP1* and *fecl2*; in one strain the cluster lacked *fecl2*. 122 strains lacked the *reb* cluster, *rebP1* and *fecl2*.

File Name: Supplementary Data 2

Description: List of all 126 proteins (represented by two or more peptides) found in the SDS-insoluble fraction by tandem mass spectrometry.
